# Supplementary material
Source: PubMed Central journal article supplement (PMC2414297)

**Supplemental Figure 1.** HMW1B and HMW1B<sub>234-545</sub> purification **A & C.** Chromatograms of HMW1B and HMW1B<sub>234-545</sub>, respectively, obtained from the size exclusion column show that the proteins elute at the same elution volumes as previously published, which were shown to correspond to tetramers (Surana et al., 2004, 2006). **B.** SDS-PAGE on a 10% gel of full-length HMW1B samples kept at room temperature or heated to 100°C for 10 minutes prior loading. The heat modifiability of the protein is typical of  $\beta$ -barrels and confirms the conservation of the native structure during purification. Note that the unheated sample does not show a high oligomeric form because of its SDS sensitivity, as reported (Surana et al., 2004). “M” stands for molecular weight markers (in kDa).

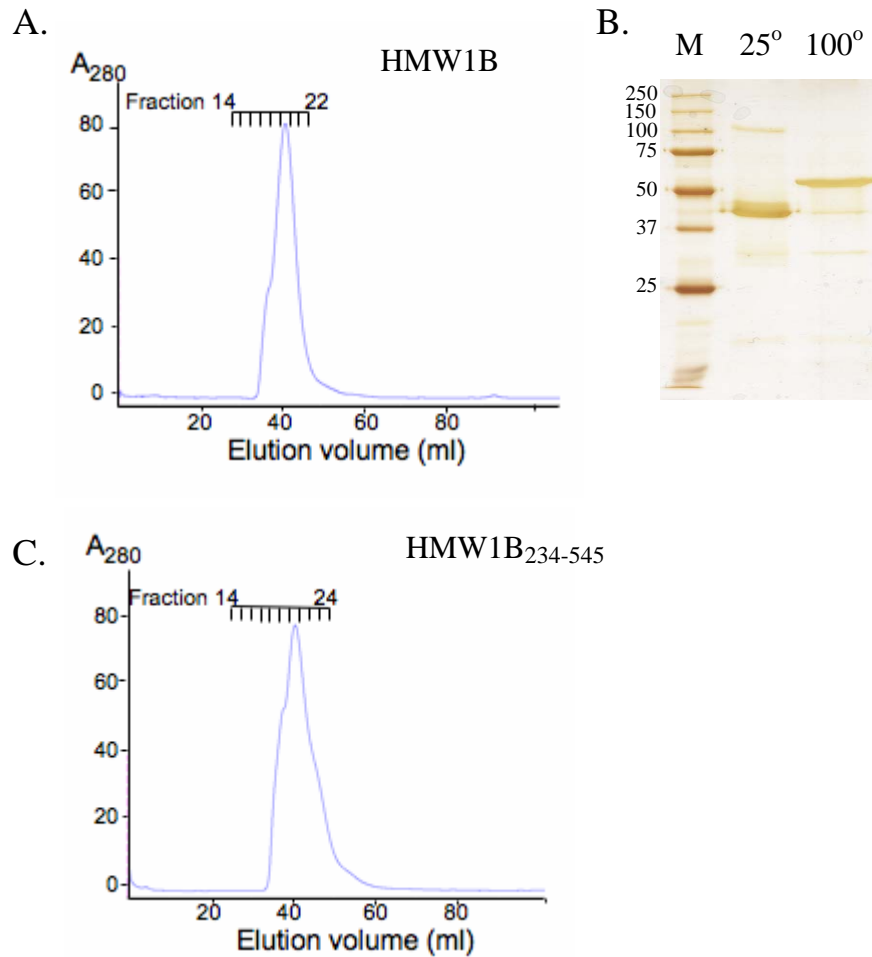

Supplement: supp_M708970200_Supplemental_Figure_1.pdf [file supp_M708970200_Supplemental_Figure_1.pdf]
