# Supplementary material
Source: PubMed Central journal article supplement (PMC2414297)

**Supplemental Figure 2. A. Interaction between HMW1B and GST::HMW1-PP.** The binding of HMW1B to GST::HMW1-PP (black) or to GST control (red) was measured with an ELISA-based protein binding assay as described in Material and Methods. The data ( $n = 4$ ) was fitted to a saturation binding curve using a nonlinear regression fitting routine of the Origin 6.1 software to the following equation:  $Y = B_{\max} \cdot X^n / (K_d^n + X^n)$ , where  $B_{\max}$  is the maximal absorbance at 492 nm in the binding assay,  $X$  is the concentration of HMW1B (nM),  $n$  is the curve slope factor, and  $K_d$  is the dissociation constants. This fit yielded the following parameters:  $B_{\max} = 3.61 \pm 0.14$ ,  $n = 1.1$ , and  $K_d = 125.8 \pm 14.4$  (nM). **B. Inhibition of HMW1B binding to GST::HMW1-PP by HMW1-PP.** Mixtures of a constant concentration of HMW1B (0.1  $\mu$ M) and varying concentrations of GST-free HMW1-PP were incubated with GST::HMW1-PP immobilized microplates, and the binding affinity was measured by an ELISA-based protein binding assay as described in Material and Methods. The data ( $n = 4$ ) was fitted to a competitive binding curve using a nonlinear regression fitting routine of the Origin 6.1 software to the following logistic equation:  $Y = A_2 + (A_1 - A_2) / (1 + (X / IC_{50})^p)$ , where  $X$  is the concentration of HMW1-PP (nM),  $A_1$  is the maximal binding of HMW1B and GST::HMW1-PP in the absence of HMW1-PP,  $A_2$  is the binding of HMW1B to GST::HMW1-PP in the presence of a saturating concentration of HMW1-PP,  $p$  is the curve slope factor, and  $IC_{50}$  is the concentration of HMW1-PP that blocks 50% of the binding of HMW1B to GST::HMW1-PP. HMW1B binding to GST::HMW1-PP in the absence of HMW1-PP was set to 100%. The fit yielded an  $IC_{50}$  value of  $125.5 \pm 12.5$  nM.

A.

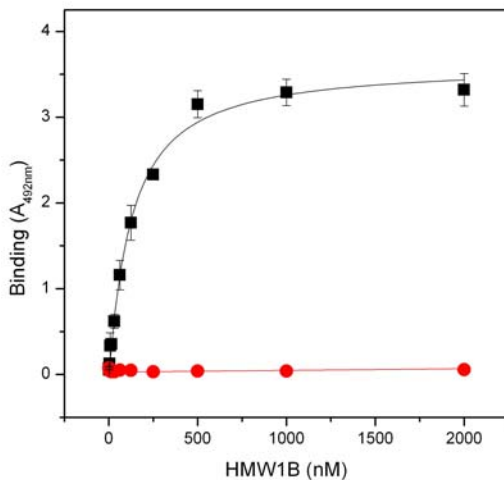

B.

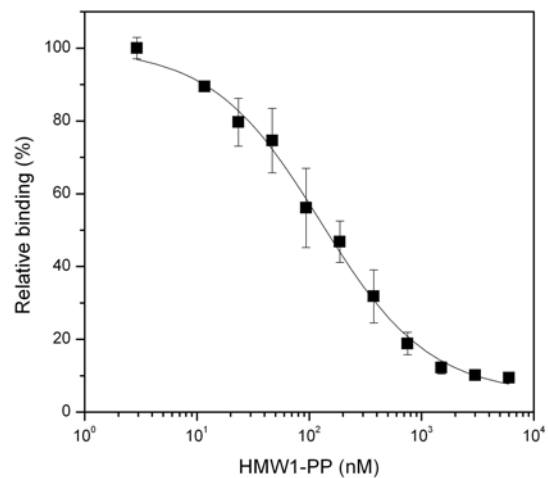

Supplement: supp_M708970200_Supplemental_Figure_2.pdf [file supp_M708970200_Supplemental_Figure_2.pdf]
